# Co-expression network analysis identified six hub genes in association with metastasis risk and prognosis in hepatocellular carcinoma

Pengfei Chen<sup>1,2,3,\*</sup>, Fan Wang<sup>1,2,\*</sup>, Juerong Feng<sup>1,2</sup>, Rui Zhou<sup>1,2</sup>, Ying Chang<sup>1,2</sup>, Jing Liu<sup>1,2</sup> and Qiu Zhao<sup>1,2</sup>

<sup>1</sup>Department of Gastroenterology, Zhongnan Hospital of Wuhan University, Wuhan, China

<sup>2</sup>Hubei Clinical Center and Key Laboratory of Intestinal and Colorectal Diseases, Wuhan, China

<sup>3</sup>Department of Gastroenterology, The Central Hospital of Enshi Autonomous Prefecture, Enshi, China

\*These authors contributed equally to this work

**Correspondence to:** Qiu Zhao, **email:** zhaoqiuw@163.com

**Keywords:** hepatocellular carcinoma, co-expression network analysis, hub genes, metastasis risk, prognosis

**Received:** January 31, 2017

**Accepted:** March 21, 2017

**Published:** April 06, 2017

Copyright: Chen et al. This is an open-access article distributed under the terms of the Creative Commons Attribution License 3.0 (CC BY 3.0), which permits unrestricted use, distribution, and reproduction in any medium, provided the original author and source are credited.

## ABSTRACT

Hepatocellular carcinoma (HCC) has a high incidence and mortality worldwide, and its carcinogenesis and progression are influenced by a complex network of gene interactions. A weighted gene co-expression network was constructed to identify gene modules associated with the clinical traits in HCC ( $n = 214$ ). Among the 13 modules, high correlation was only found between the red module and metastasis risk (classified by the HCC metastasis gene signature) ( $R^2 = -0.74$ ). Moreover, in the red module, 34 network hub genes for metastasis risk were identified, six of which (ABAT, AGXT, ALDH6A1, CYP4A11, DAO and EHHADH) were also hub nodes in the protein-protein interaction network of the module genes. Thus, a total of six hub genes were identified. In validation, all hub genes showed a negative correlation with the four-stage HCC progression ( $P$  for trend  $< 0.05$ ) in the test set. Furthermore, in the training set, HCC samples with any hub gene lowly expressed demonstrated a higher recurrence rate and poorer survival rate (hazard ratios with 95% confidence intervals  $> 1$ ). RNA-sequencing data of 142 HCC samples showed consistent results in the prognosis. Gene set enrichment analysis (GSEA) demonstrated that in the samples with any hub gene highly expressed, a total of 24 functional gene sets were enriched, most of which focused on amino acid metabolism and oxidation. In conclusion, co-expression network analysis identified six hub genes in association with HCC metastasis risk and prognosis, which might improve the prognosis by influencing amino acid metabolism and oxidation.

## INTRODUCTION

Hepatocellular carcinoma (HCC) is one of the most common malignancies worldwide, and it is the second leading cause of cancer-related death among males [1]. Multiple factors were reported to be related with the carcinogenesis and progression in HCC, like chronic infection of hepatitis B virus (HBV) or hepatitis C virus (HCV), alcohol consumption and smoking [2]. However, the mechanism remains obscure. In recent years, with the development of gene microarray and RNA sequencing, gene expression profiling has been used to identify genes

associated the carcinogenesis and development of HCC. Through gene ontology analysis, the mechanism has been partially illustrated. However, most studies focused on the screening of differentially expressed genes, and ignored the high interconnection between genes although genes with similar expression patterns are probably correlated in function [3]. In this study, we adopted the systems biology-based approach of weighted gene co-expression network analysis (WGCNA) to construct a co-expression network based on the relationship between genes, and identified significant gene modules and hub genes associated with the clinical traits in HCC.

## RESULTS

### DEGs screening

After outlier exclusion, the gene profiles of 443 samples were analyzed. Under the threshold of  $FDA < 0.05$  and  $|\log_2 FC| > 0.585$ , a total of 3670 DEGs (2213 up-regulated and 1457 down-regulated in HCC) were selected for subsequent analysis.

### Characteristics of the included samples in co-expression analysis

214 HCC samples with complete clinical data were included in co-expression analysis. The samples had an average age of 50.7 years, and a high proportion of males (86.4%, 185/214) (Figure 1). 87 (40.7%) cases had high levels of serum alanine aminotransferase (ALT,  $> 50$  U/L), and 97 (45.3%) with high levels of serum alpha-fetoprotein (AFP,  $> 300$  ng/ml). 197 (92.1%) cases were concomitant with cirrhosis. 44 (20.6%) cases were multinodular, and the main tumor size in 77 (36.0%) cases were more than 5 cm. Three kinds of tumor staging were adopted: TNM (Tumor Node Metastasis), BCLC (Barcelona Clinic Liver Cancer) and CLIP (Cancer of the Liver Italian Program). Metastasis risk (PRMS) was predicted based on the 161 gene HCC metastasis signature, and 103 (48.1%) cases were at high risk [4].

### Co-expression network construction and key modules identification

Using “WGCNA” package in R, the DEGs with similar expression patterns were grouped into modules via the average linkage hierarchical clustering. Here, the power of  $\beta = 6$  (scale free  $R^2 = 0.85$ ) was selected as the soft-thresholding to ensure a scale-free network (Figure 2). A total of 13 modules were identified (Figure 3A). Two methods were used to test the relevance between each module and clinical traits. Firstly, the ME in several modules showed a correlation with certain clinical traits ( $P < 0.05$ ). However, most of the correlations were low to moderate ( $R^2 < 0.5$ ), and only the correlation between the red module and metastasis risk (PRMS) was high ( $P = 3 \times 10^{-38}$ ,  $R^2 = -0.74$ ) (Figure 3B). Secondly, in relation with metastasis risk, the red module also had the highest MS (Figure 3C). Thus, the red module with metastasis risk was identified as the clinical significant module, which was extracted for further analysis.

### Identification of hub genes for metastasis risk in the red module

Highly connected hub genes in a module play important roles in the biological processes [5]. Therefore, 34 genes with the high connectivity (weighted correlation coefficients  $> 0.8$ ) in red module were taken as candidate hub genes for metastasis risk in the module (Table 1).

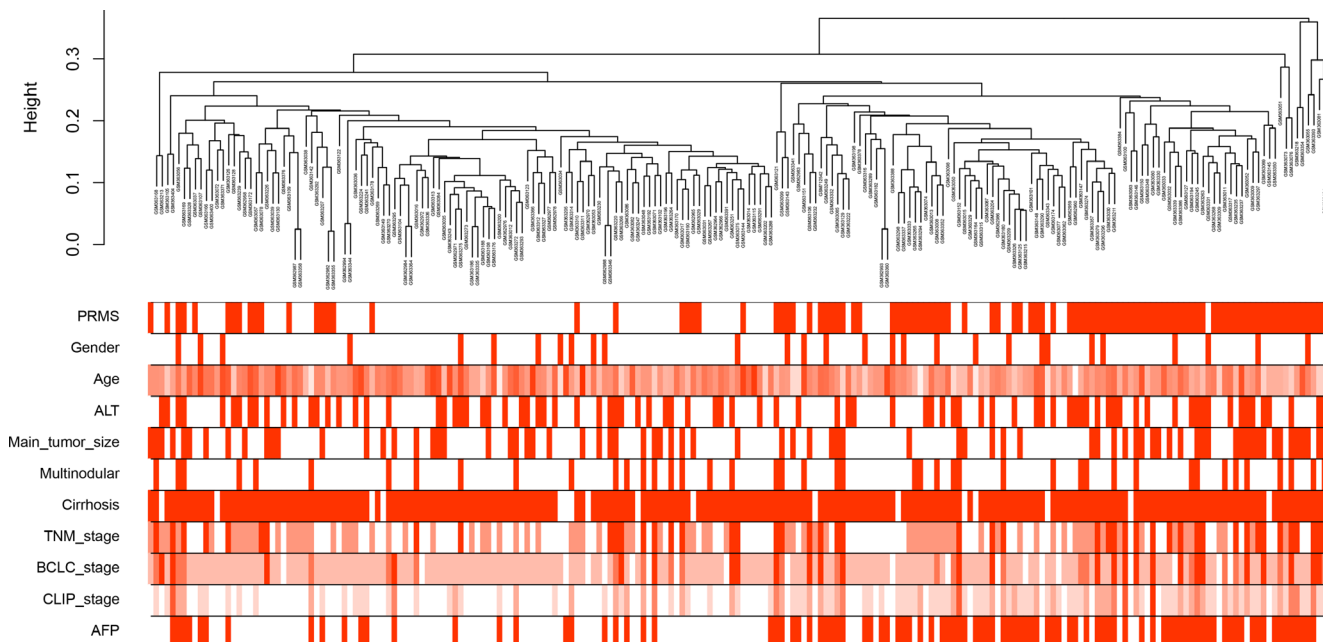

**Figure 1: Clustering dendrogram of 214 tumor samples and the clinical traits.** The clustering was based on the expression data of differentially expressed genes between tumor samples and non-tumor samples in hepatocellular carcinoma. PRMS: predicted risk metastasis signature. ALT: alanine aminotransferase. TNM: Tumor Node Metastasis. BCLC: Barcelona Clinic Liver Cancer. CLIP: Cancer of the Liver Italian Program. AFP: alpha-fetoprotein. The red color represented high metastasis risk, female, high ALT levels ( $> 50$  U/L), large tumor size ( $> 5$  cm), multinodular, cirrhosis and high AFP levels ( $> 300$  ng/ml). The color intensity was proportional to older age and higher stage of TNM, BCLC and CLIP.

**Table 1: Hub genes in the module related with metastasis risk**

| Gene     | Probe       | Co-expression analysis |            |              | Hub gene in PPI network | DEG analysis |          |
|----------|-------------|------------------------|------------|--------------|-------------------------|--------------|----------|
|          |             | p.Weighted             | q.Weighted | cor.Weighted |                         | logFC        | FDR      |
| ABAT     | 209459_s_at | 0                      | 0          | -0.85        | YES                     | -1.80        | 8.77E-54 |
| AGXT     | 210326_at   | 0                      | 0          | -0.80        | YES                     | -1.88        | 5E-38    |
| ALDH6A1  | 221590_s_at | 0                      | 0          | -0.83        | YES                     | -2.26        | 1.98E-63 |
| CYP4A11  | 211231_x_at | 0                      | 0          | -0.81        | YES                     | -2.53        | 3.28E-86 |
| DAO      | 206878_at   | 0                      | 0          | -0.83        | YES                     | -1.38        | 2.75E-33 |
| EHHADH   | 205222_at   | 0                      | 0          | -0.81        | YES                     | -1.55        | 7.15E-45 |
| ABCA6    | 217504_at   | 0                      | 0          | -0.80        | NO                      | -1.55        | 6.37E-42 |
| AGXT2L1  | 221008_s_at | 0                      | 0          | -0.82        | NO                      | -2.53        | 5.85E-44 |
| ALDH2    | 201425_at   | 0                      | 0          | -0.85        | NO                      | -1.50        | 4.39E-68 |
| ALDH5A1  | 203608_at   | 0                      | 0          | -0.81        | NO                      | -1.03        | 9.4E-29  |
| ALDOB    | 204704_s_at | 0                      | 0          | -0.83        | NO                      | -2.90        | 4.04E-57 |
| APOC4    | 206738_at   | 0                      | 0          | -0.85        | NO                      | -2.07        | 2.73E-40 |
| CAT      | 201432_at   | 0                      | 0          | -0.84        | NO                      | -1.18        | 2.23E-49 |
| CES2     | 213509_x_at | 0                      | 0          | -0.83        | NO                      | -1.41        | 9.92E-31 |
| CYB5A    | 207843_x_at | 0                      | 0          | -0.80        | NO                      | -0.72        | 1.26E-21 |
| DCXR     | 217973_at   | 0                      | 0          | -0.88        | NO                      | -1.87        | 4.93E-53 |
| DHRS1    | 213279_at   | 0                      | 0          | -0.83        | NO                      | -1.73        | 6.04E-59 |
| EPHX2    | 209368_at   | 0                      | 0          | -0.82        | NO                      | -1.95        | 1.06E-59 |
| F13B     | 207810_at   | 0                      | 0          | -0.81        | NO                      | -0.85        | 2.7E-11  |
| FMO4     | 206263_at   | 0                      | 0          | -0.83        | NO                      | -1.26        | 8.51E-32 |
| GLYAT    | 222083_at   | 0                      | 0          | -0.82        | NO                      | -3.57        | 1.87E-90 |
| GYS2     | 214621_at   | 0                      | 0          | -0.81        | NO                      | -3.42        | 1.93E-81 |
| HAGH     | 205012_s_at | 0                      | 0          | -0.88        | NO                      | -1.29        | 2.92E-43 |
| HGD      | 205221_at   | 0                      | 0          | -0.80        | NO                      | -1.59        | 4.94E-40 |
| HRSP12   | 203790_s_at | 0                      | 0          | -0.81        | NO                      | -1.48        | 1.18E-43 |
| HSD17B6  | 37512_at    | 0                      | 0          | -0.81        | NO                      | -1.87        | 7.7E-30  |
| PCK2     | 202847_at   | 0                      | 0          | -0.87        | NO                      | -1.53        | 3.88E-49 |
| PXMP2    | 219076_s_at | 0                      | 0          | -0.82        | NO                      | -1.08        | 1.48E-32 |
| RGN      | 210751_s_at | 0                      | 0          | -0.81        | NO                      | -1.47        | 3.99E-51 |
| SEC14L2  | 204541_at   | 0                      | 0          | -0.87        | NO                      | -1.78        | 2.27E-53 |
| SERPINC1 | 210049_at   | 0                      | 0          | -0.82        | NO                      | -1.09        | 1.34E-16 |
| SLC10A1  | 207185_at   | 0                      | 0          | -0.85        | NO                      | -3.04        | 2.13E-50 |
| SLC27A5  | 219733_s_at | 0                      | 0          | -0.90        | NO                      | -2.62        | 3.86E-66 |
| SULT2A1  | 206292_s_at | 0                      | 0          | -0.85        | NO                      | -1.77        | 1.62E-28 |

Abbreviations: PPI: protein-protein interaction. FC: fold change. DEG: differentially expressed genes. FDR: false discovery rate.

Furthermore, We also constructed a network of protein-protein interaction (PPI) for the genes in red module according to the STRING database, and six hub genes (ABAT, AGXT, ALDH6A1, CYP4A11, DAO) in the co-expression network were also identified as hub nodes in the PPI network (Figure 4). Finally, these six genes were regarded as “real” hub genes for metastasis risk and selected for further analyses.

### Hub genes validation

The hub genes were identified in strong correlation with HCC metastasis risk. As the metastasis risk increased with HCC progression and high metastasis risk indicated a poor prognosis, we validated the hub genes indirectly by investigating their roles in HCC progression and prognosis.

In the test set of GSE6764, linear regression analyses were conducted on the six hub genes, all of which showed a negative correlation with HCC progression ( $P$  for trend  $< 0.05$ ) (Figure 5). In the training set, based on the microarray data of 214 HCC samples, we investigated the role of hub genes in HCC prognosis. All samples were divided into two groups according to the expression levels of hub genes respectively. We found a higher recurrence rate and a poorer survival rate in the samples with any hub gene lowly expressed (Figures 6, 7). In recurrence analysis, the hazard ratios (HR) and corresponding 95% confidence intervals (CI) were 1.487 (1.037–2.131) for ABAT, 1.585 (1.105–2.274) for AGXT, 1.495 (1.042–2.144) for ALDH6A1, 1.655 (1.153–2.375) for CYP4A11, 1.727 (1.201–2.484) for DAO and 1.727 (1.201–2.484). In survival analysis, the HRs and CIs were 1.777 (1.156–2.732) for ABAT, 1.926 (1.252–2.965) for AGXT, 1.638 (1.065–2.520) for ALDH6A1, 2.165 (1.405–3.335)

for CYP4A11, 1.753 (1.140–2.695) for DAO and 2.076 (1.348–3.198) for EHHADH.

In the RNA-sequencing data of 423 HCC samples, the survival data in 142 samples were available. We also found a poorer survival rate in the samples with low expression levels of ABAT, AGXT, ALDH6A1, CYP4A11 or DAO, and it showed a deadline effect in EHHADH (Figure 8). The HRs and CIs were 1.428 (1.012–2.013) for ABAT, 1.436 (1.018–2.026) for AGXT, 1.503 (1.061–2.129) for ALDH6A1, 1.572 (1.111–2.224) for CYP4A11, 1.531 (1.083–2.164) for DAO and 1.343 (0.954–1.890) for EHHADH.

### Gene set enrichment analysis

To identify potential function of the hub genes, GSEA was conducted respectively to search KEGG (Kyoto Encyclopedia of Genes and Genomes) pathways enriched

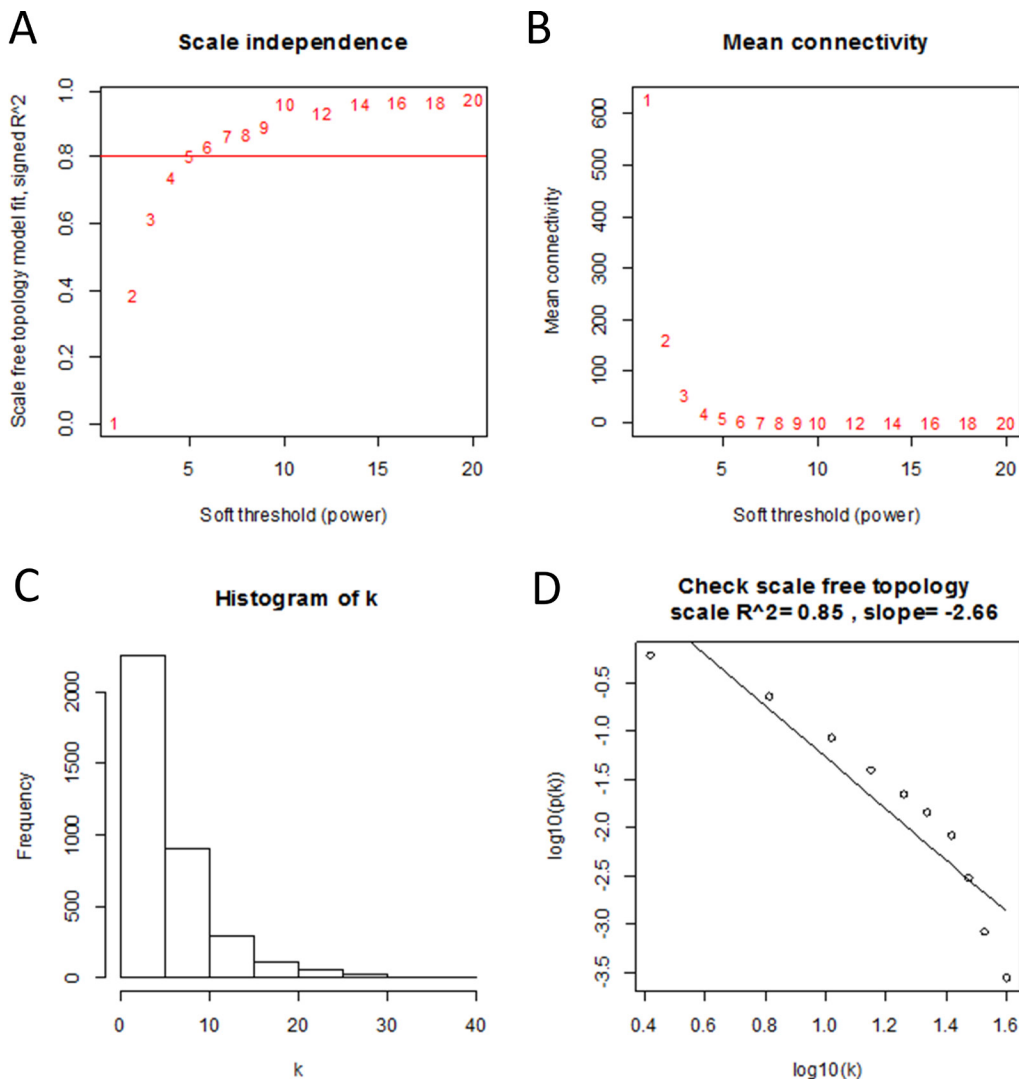

**Figure 2: Determination of soft-thresholding power in the weighted gene co-expression network analysis (WGCNA).** (A) Analysis of the scale-free fit index for various soft-thresholding powers (β). (B) Analysis of the mean connectivity for various soft-thresholding powers. (C) Histogram of connectivity distribution when β = 6. (D) Checking the scale free topology when β = 6.

in the samples with the gene highly expressed. A total of 24 functional gene sets were enriched in the samples with high expression levels of any hub gene, and most sets focused on amino acid metabolism and oxidation (Supplementary Table 1). Six gene sets were enriched in the samples with at least three hub genes highly expressed, namely “alanine, aspartate and glutamate metabolism”, “complement and coagulation cascades”, “cysteine and methionine metabolism”, “drug metabolism cytochrome P450”, “peroxisome” and “tyrosine metabolism” (Figure 9).

## DISCUSSION

Hepatocellular carcinoma is the most frequent malignant tumor in the liver, and its mortality is high which contributes to the high frequency of late-stage disease, metastasis and the “field effect” [6]. Currently,

surgery is the most effective treatment, but the recurrence rate is high. As metastasis contributes to 90% of all cancer related death, it is important for metastasis risk prediction [7]. For those with high risk of metastasis, additional therapies were needed.

In the study of Roessler et al. and their previous study, they identified a 161 gene signature as a metastasis risk classifier, which was also validated in another cohort [6, 8]. The signature could also predict HCC survival successfully in the cases with early disease and solitary tumors. Furthermore, it predicted particularly well for early recurrence risk. In our study, we also identified six genes (ABAT, AGXT, ALDH6A1, CYP4A11, DAO and EHHADH) in association with the high risk in metastasis prediction, and none of the genes were included in the 161-gene set of Roessler et al. In further analyses, these six genes were also significantly associated with

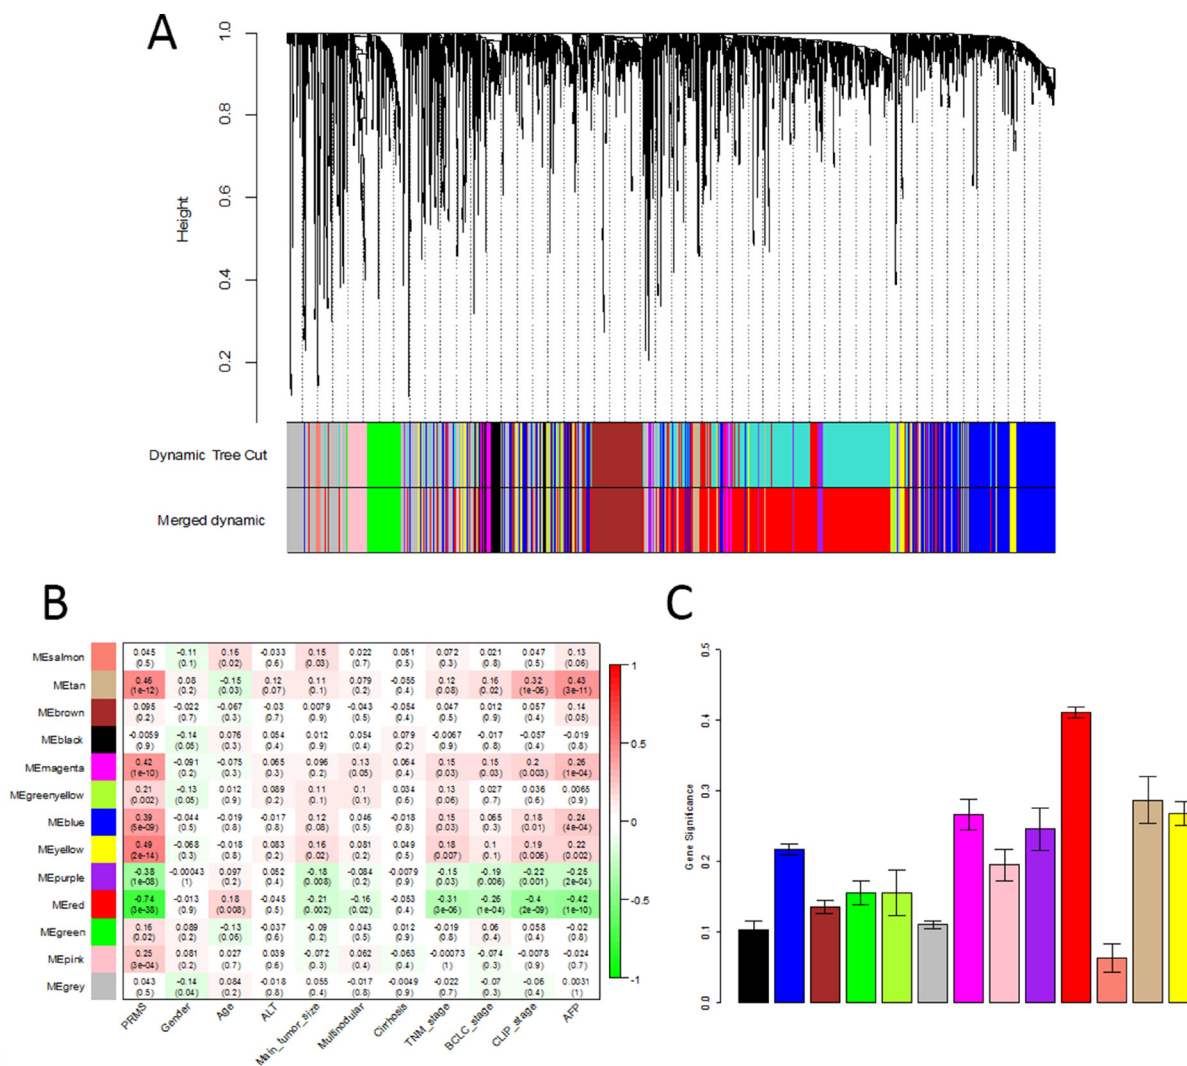

**Figure 3: Identification of modules associated with clinical traits.** (A) Clustering dendrogram of all differentially expressed genes in 214 samples of hepatocellular carcinoma. (B) Heatmap between the correlation between module eigengenes and clinical traits. Each cell contained the corresponding correlation and *P* value (C) Distribution of average gene significance and errors in the modules associated with the metastasis risk in hepatocellular carcinoma.

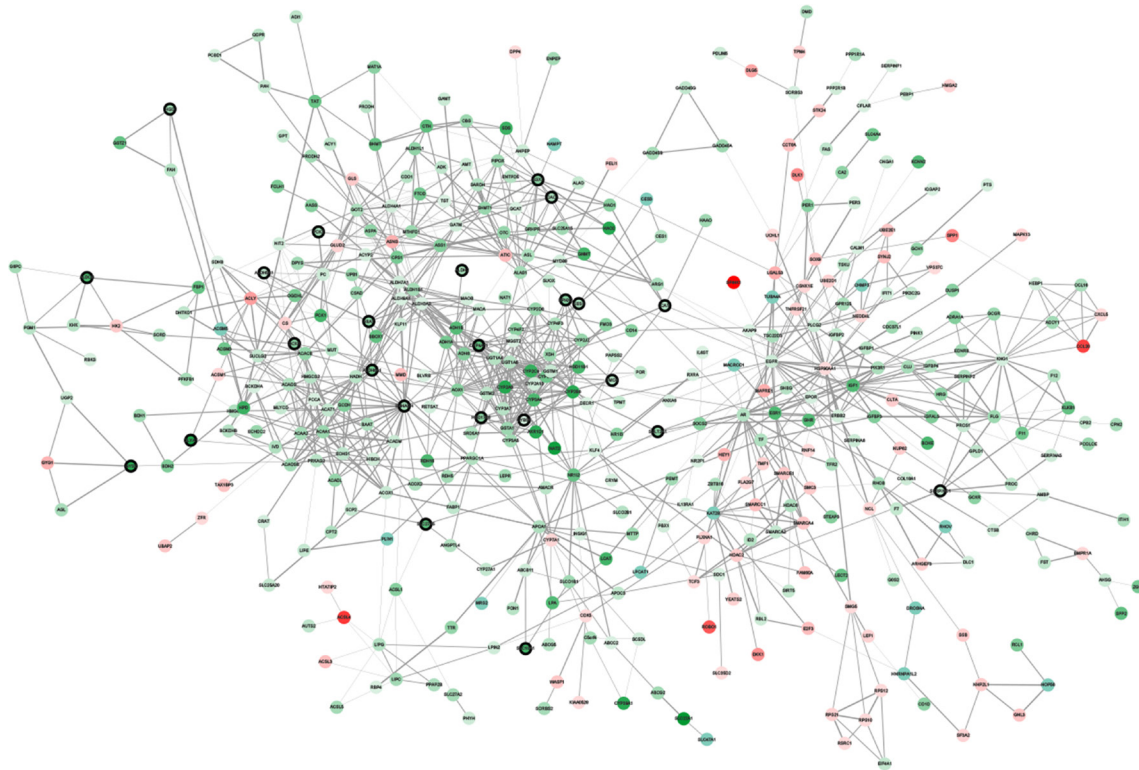

**Figure 4: Protein-protein interaction network of genes in the red module.** The color intensity in each node was proportional to change fold of expression in comparison to non-tumor samples (up-regulation in red and down-regulation in green). The nodes with bold circle represented the hub genes identified by co-expression network analysis. The edge width was proportional to the score of protein-protein interaction based on the STRING database.

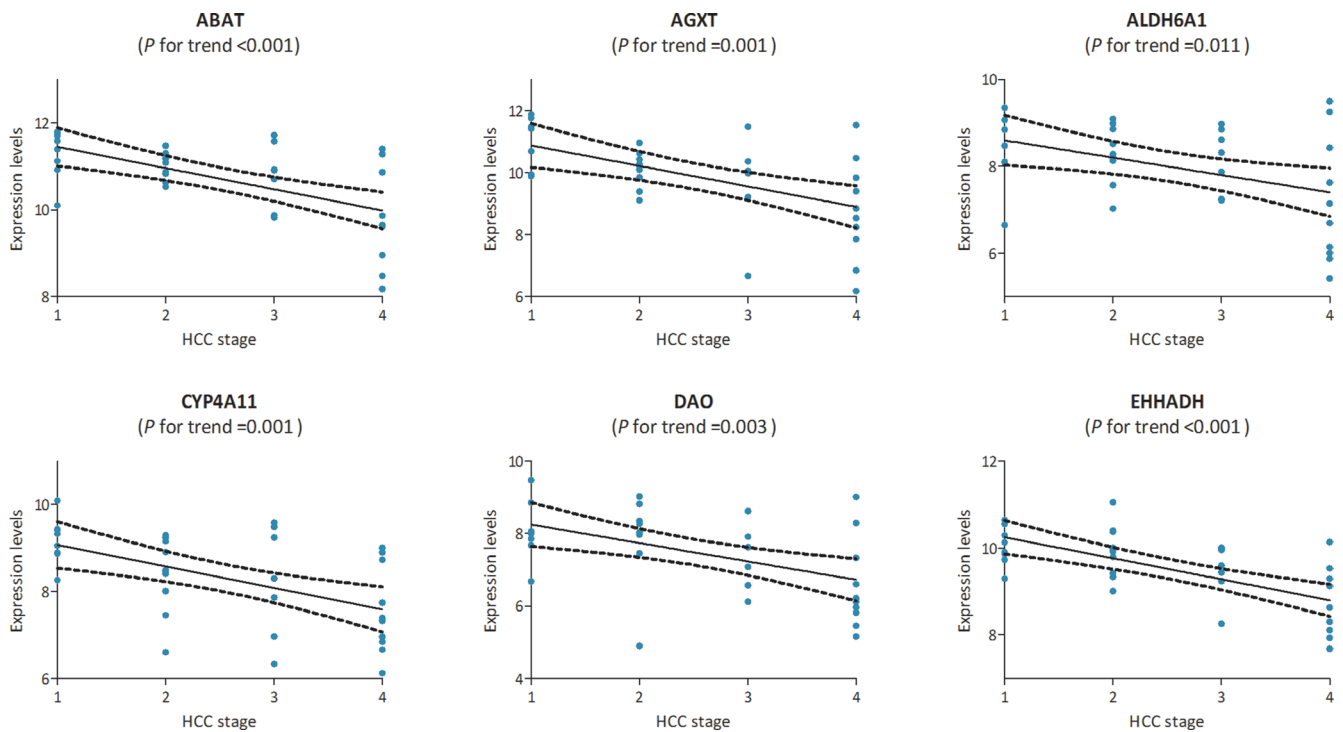

**Figure 5: The correlation between the expression levels of ABAT, AGXT, ALDH6A1, CYP4A11, DAO and EHHADH and the disease progression of hepatocellular carcinoma (HCC) (based on microarray data of GSE6764).** Stage: 1 for very early HCC, 2 for early HCC, 3 for advanced HCC, and 4 for very advanced HCC.

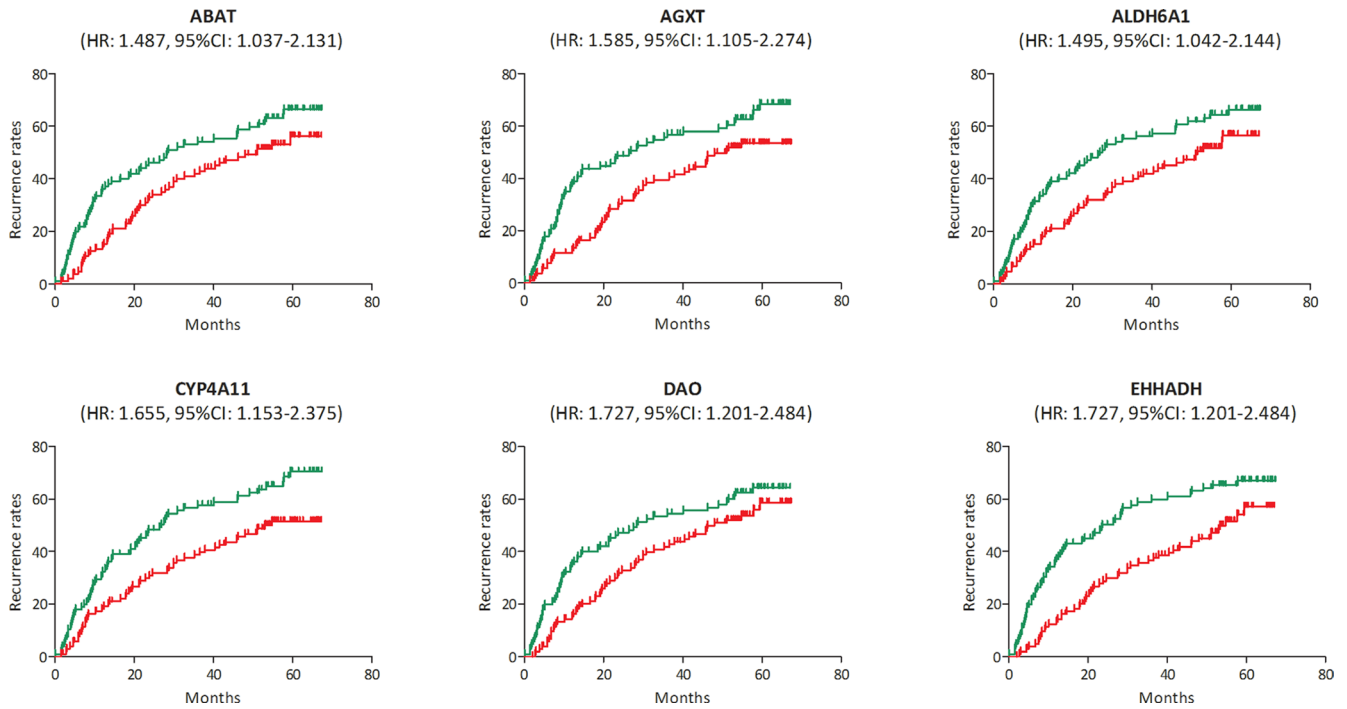

**Figure 6: Recurrence analysis of the association between the expression levels of ABAT, AGXT, ALDH6A1, CYP4A11, DAO and EHHADH and recurrence rates in hepatocellular carcinoma (HCC) (based on microarray data of GSE14520).** Red line represented the samples with gene highly expressed, and green line was for the samples with gene lowly expressed. HR: hazard ratio, CI: confidence interval.

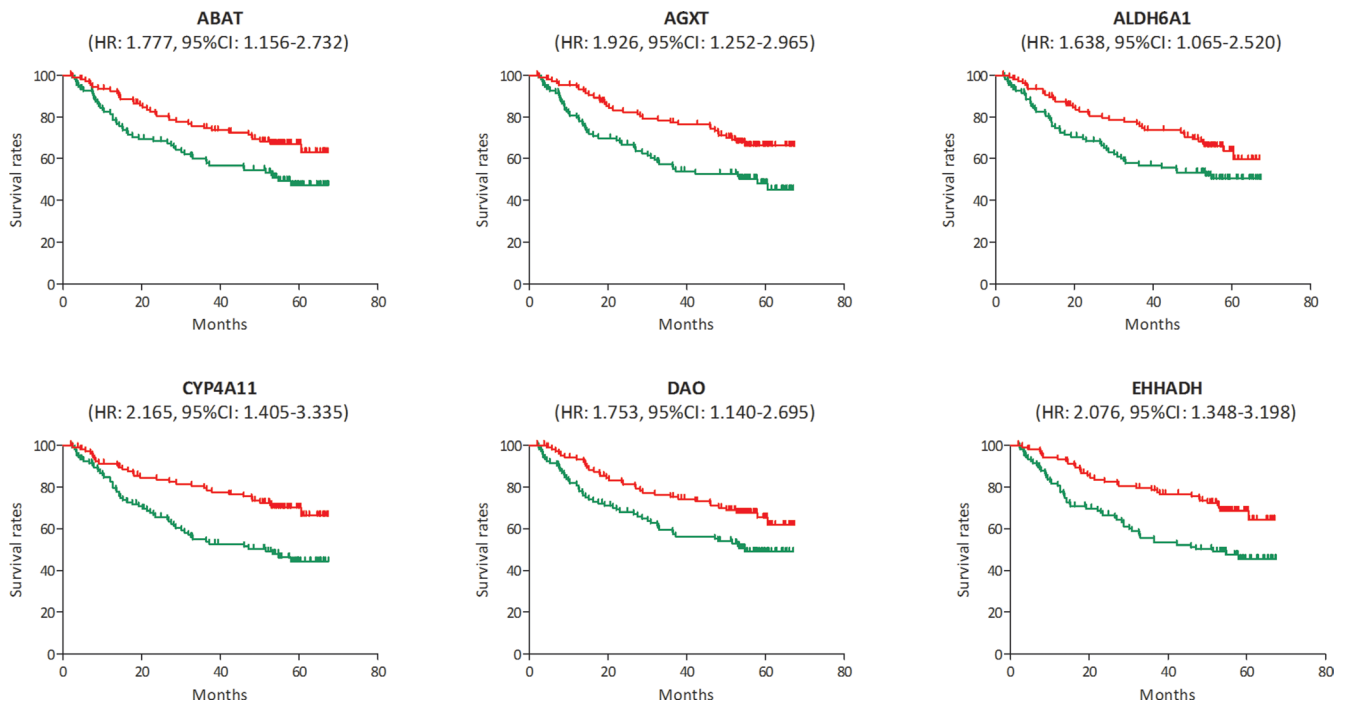

**Figure 7: Survival analysis of the association between the expression levels of ABAT, AGXT, ALDH6A1, CYP4A11, DAO and EHHADH and survival rates in hepatocellular carcinoma (HCC) (based on microarray data of GSE14520).** Red line represented the samples with gene highly expressed, and green line was for the samples with gene lowly expressed. HR: hazard ratio, CI: confidence interval.

HCC prognosis including recurrence and survival. RNA sequencing data showed consistent results, indicating our results were stable and independent of cohorts and gene profiling technologies.

ABAT (4-aminobutyrate aminotransferase) is responsible for catabolism of  $\gamma$ -aminobutyric acid (GABA) (an important and mostly inhibitory neurotransmitter in the central nervous system) into

succinic semialdehyde [9]. Reis et al. found that ABAT was a protein biomarker with high sensitivity (84.4%/84.4%) in the diagnosis of hepatocellular differentiation and hepatoid adenocarcinomas [10].

AGXT (alanine-glyoxylate aminotransferase) is expressed only in the liver and the encoded protein is localized mostly in the peroxisomes, where it is involved in glyoxylate detoxification [11]. In Kjersem et al. study,

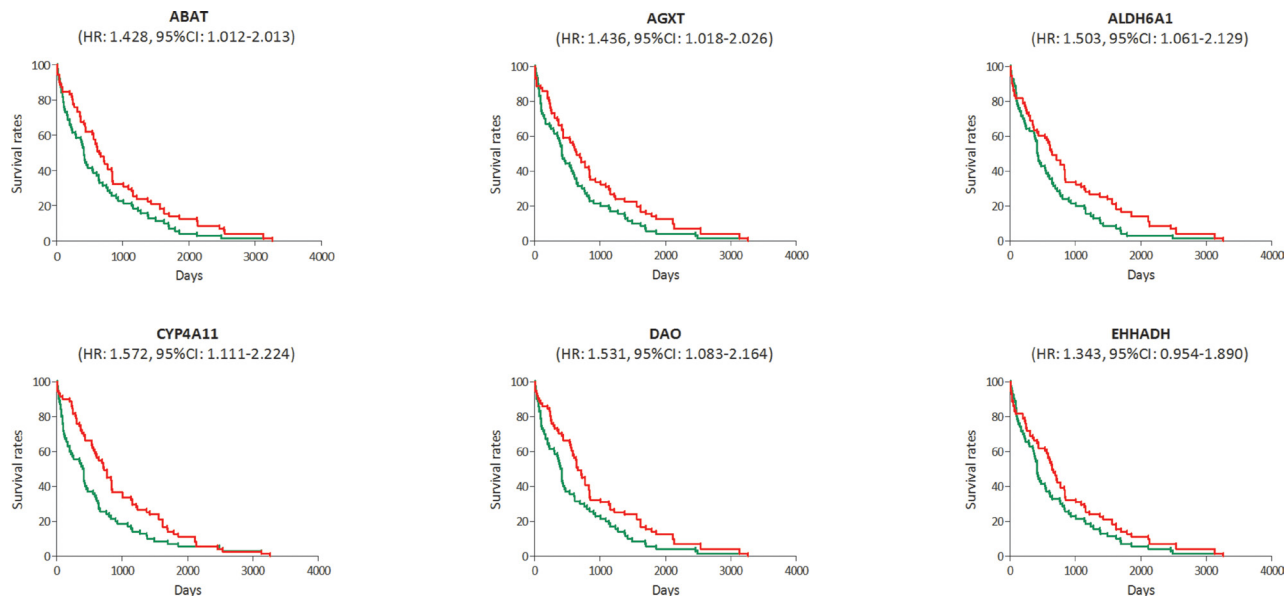

**Figure 8: Survival analysis of the association between the expression levels of ABAT, AGXT, ALDH6A1, CYP4A11, DAO and EHHADH and survival rates in hepatocellular carcinoma (HCC) (based on RNA-sequencing data).** Red line represented the samples with gene highly expressed, and green line was for the samples with gene lowly expressed. HR: hazard ratio, CI: confidence interval.

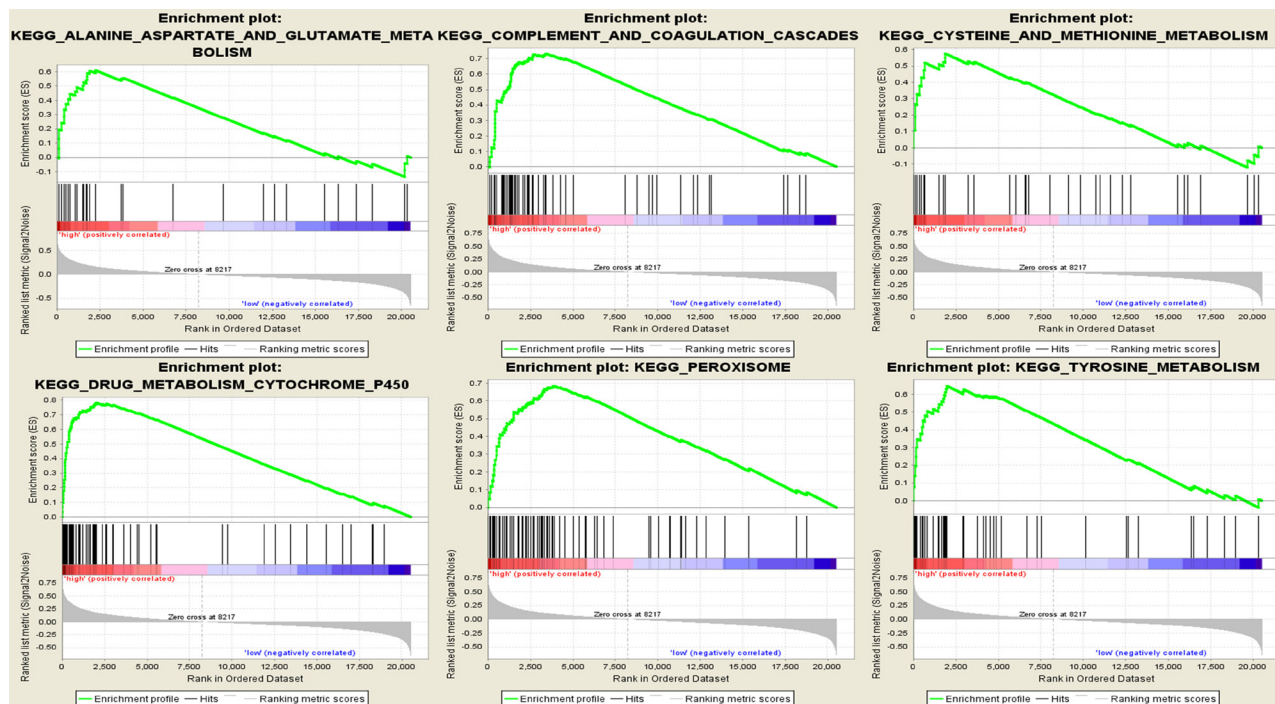

**Figure 9: Gene set enrichment analysis (GSEA).** Only listed the six most common functional gene sets enriched in hepatocellular carcinoma samples with CYP4A11 highly expressed.



AGXT polymorphisms was associated with clinical outcome in metastatic colorectal cancer patients with 5-fluorouracil/oxaliplatin [12].

ALDH6A1 (aldehyde dehydrogenase 6 family, member A1) encodes a member of the aldehyde dehydrogenase protein family, and the encoded protein is a mitochondrial methylmalonate semialdehyde dehydrogenase that plays a role in the valine and pyrimidine catabolic pathways [13]. Liu et al. also found that ALDH6A1 was down-regulated in HCC [14].

CYP4A11 (cytochrome P450, family 4, subfamily A, polypeptide 11) encodes a member of the cytochrome P450 superfamily of enzymes, which are monooxygenases and catalyze many reactions involved in drug metabolism and synthesis of cholesterol, steroids and other lipids [5]. Wnt/ $\beta$ -catenin signaling was abnormally activated in the progression of HCC, and activation of the Wnt/ $\beta$ -catenin pathway could prevent peroxisome proliferator-activated receptor (PPAR)  $\alpha$ -mediated induction of CYP4A11 [15, 16].

DAO (D-amino-acid oxidase) encodes the peroxisomal enzyme D-amino acid oxidase, which is a flavoprotein that uses flavin adenine dinucleotide (FAD) as its prosthetic group [17]. Fang et al. found that tumor-targeted delivery of polyethylene glycol (PEG)-conjugated DAO produced remarkable antitumor activity via enzymatic generation of hydrogen peroxide ( $H_2O_2$ ) [18].

EHHADH (enoyl-CoA hydratase and 3-hydroxyacyl CoA dehydrogenase) encodes a bifunctional enzyme which is one of the four enzymes of the peroxisomal  $\beta$ -oxidation pathway [19]. Suto et al. also found decreased expression of EHHADH in HCC [20].

The six hub genes showed a protective role in carcinogenesis mainly by correlating with the amino acid metabolism and oxidation. In gene set enrichment analysis, we also found that the gene sets associated with amino acid metabolism and oxidation were enriched in the samples with hub genes highly expressed.

In conclusion, co-expression network analysis identified six hub genes in association with HCC metastasis risk and prognosis, which might improve the prognosis by influencing amino acid metabolism and oxidation.

## MATERIALS AND METHODS

### Data collection

Normalized data of gene expression and related clinical data were downloaded from Gene Expression Omnibus (GEO) database (<http://www.ncbi.nlm.nih.gov/geo/>). Dataset GSE14520 was used as a training set to construct expression network and identify hub genes in this study. This dataset was based on the microarray platform of Affymetrix HT Human Genome U133A

Array (HT\_HG-U133A), and included 225 samples of hepatocellular carcinoma (HCC) and 220 samples of non-tumor tissues. Another independent dataset of GSE6764 was downloaded from GEO database and used as a test set to verify our results. This dataset was based on the platform of Affymetrix Human Genome U133 Plus 2.0 Array (HG-U133\_Plus\_2) and included 35 HCC samples covering four stepwise pathological stages of HCC progression (including very early HCC, early HCC, advanced HCC and very advanced HCC). Moreover, RNA-sequencing data of 423 HCC samples were also downloaded from The Cancer Genome Atlas (TCGA) database (<https://genome-cancer.ucsc.edu/>) to further verify our results. The gene expression data were based on the RNA-sequencing technology of IlluminaHiSeq.

### Data preprocessing

Microarray quality was assessed by sample clustering according to the distance between different samples in Pearson's correlation matrices, and a height cut of 0.2 was chosen to identify potential microarray outliers. Two samples (GSM363045 and GSM363217) were detected as outliers and removed from the subsequent analysis (Supplementary Figure 1).

### Differentially expressed genes (DEGs) screening

The "limma" (linear models for microarray data) R package was used to screen the DEGs between HCC tumor tissues and non-tumor tissues. The false discovery rate (FDR)  $< 0.05$  and  $|\log_2$  fold change (FC)|  $> 0.585$  were chosen as the cut-off criteria.

### Co-expression network construction

The "WGCNA" package in R was used to construct co-expression network for the DEGs in 214 tumor samples (one was excluded for outlier and ten were for the absence of clinical data) [21]. At first, the Pearson's correlation matrices were calculated for all pair-wise genes. Then, a weighted adjacency matrix was constructed using a power function  $a_{mn} = |c_{mn}|^\beta$  ( $c_{mn}$  = Pearson's correlation between gene m and gene n;  $a_{mn}$  = adjacency between gene m and gene n).  $\beta$  was a soft-thresholding parameter that could emphasize strong correlations between genes and penalize weak correlations. Next, the adjacency was transformed into topological overlap matrix (TOM), which could measure the network connectivity of a gene defined as the sum of its adjacency with all other genes for network generation [22]. To classify genes with similar expression profiles into gene modules, average linkage hierarchical clustering was conducted according to the TOM-based dissimilarity measure with a minimum size (gene group) of 20 for the resulted dendrogram [23].

## Identification of clinical significant modules

Two approaches were used to identify modules related with clinical traits. First, module eigengenes (MEs) were defined as the first principal component in the principal component analysis for each gene module, which could summarize the expression patterns of all genes into a single characteristic expression profile within a given module. Thus, we calculated the correlation between MEs and clinical traits to identify the most relevant module. Second, gene significance (GS) was defined as the log10 transformation of the *P* value in the linear regression between gene expression and clinical traits, and module significance (MS) was defined as the average GS for all the genes in a module. The module with the maximal absolute MS among all the selected modules was usually considered as the one related with clinical trait. Finally, the module highly correlated with certain clinical trait was selected for further analysis.

## Identification of hub genes

Hub genes comprised highly interconnected nodes within a module, and have been shown to be functionally significant [24]. In this study, hub genes were defined as genes with high module membership (MM) (cor. Weighted > 0.8) [25]. We identified hub genes in the module which were highly correlated with certain clinical trait. Furthermore, in the selected module, the protein-protein interaction (PPI) network of the genes was also constructed. The interaction between genes was regarded positive with a combined score of  $\geq 0.8$  based on the STRING database (<http://www.string-db.org/>). In the PPI network, genes with a connectivity degree of  $\geq 10$  were also defined as hub genes. The common hub genes in both co-expression network and PPI network were regarded as “real” hub genes for further analyses.

## Hub gene validation

In the test set of GSE6764, linear regression analyses were conducted to validate the role of hub genes in the progression of HCC. In the training set, the hub genes were extracted for survival and recurrence analyses to identify their roles in HCC prognosis. The RNA-sequencing data were also used to validate the role of hub genes in the prognosis.

## Gene set enrichment analysis (GSEA)

In the RNA-sequencing data, 423 HCC samples were divided into two groups according to the expression level of hub genes respectively. To identify potential function of the hub gene, GSEA (<http://software.broadinstitute.org/gsea/index.jsp>) [26] was conducted to detect whether a series of priori defined biological processes were enriched

in the gene rank derived from DEGs between the two groups. For use with GSEA software, the collection of annotated gene sets of `c2.cp.kegg.v5.2.symbols.gmt` in Molecular Signatures Database (MSigDB, <http://software.broadinstitute.org/gsea/msigdb/index.jsp>) was chosen as the reference gene sets. FDR < 0.05 was chosen as the cut-off criteria.

## CONFLICTS OF INTEREST

The authors declare that they have no conflicts of interest.

## REFERENCES

1. Torre LA, Siegel RL, Ward EM, Jemal A. Global cancer incidence and mortality rates and trends—An update. *Cancer Epidemiol Biomarkers Prev.* 2016; 25:16–27.
2. Mittal S, El-Serag HB. Epidemiology of hepatocellular carcinoma: consider the population. *J Clin Gastroenterol.* 2013; 47:S2–6.
3. Tavazoie S, Hughes JD, Campbell MJ, Cho RJ, Church GM. Systematic determination of genetic network architecture. *Nat Genet.* 1999; 22:281–5.
4. Roessler S, Jia HL, Budhu A, Forgues M, Ye QH, Lee JS, Thorgeirsson SS, Sun Z, Tang ZY, Qin LX, Wang XW. A unique metastasis gene signature enables prediction of tumor relapse in early-stage hepatocellular carcinoma patients. *Cancer Res.* 2010; 70:10202–12.
5. Powell PK, Wolf I, Jin R, Lasker JM. Metabolism of arachidonic acid to 20-hydroxy-5,8,11, 14-eicosatetraenoic acid by P450 enzymes in human liver: involvement of CYP4F2 and CYP4A11. *J Pharmacol Exp Ther.* 1998; 285:1327–36.
6. Libbrecht L, Craninx M, Nevens F, Desmet V, Roskams T. Predictive value of liver cell dysplasia for development of hepatocellular carcinoma in patients with non-cirrhotic and cirrhotic chronic viral hepatitis. *Histopathology.* 2001; 39:66–73.
7. Hanahan D, Weinberg RA. The hallmarks of cancer. *Cell.* 2000; 100:57–70.
8. Ye QH, Qin LX, Forgues M, He P, Kim JW, Peng AC, Simon R, Li Y, Robles AI, Chen Y, Ma ZC, Wu ZQ, Ye SL, et al. Predicting hepatitis B virus-positive metastatic hepatocellular carcinomas using gene expression profiling and supervised machine learning. *Nat Med.* 2003; 9:416–23.
9. Yoon CS, Kim DW, Jang SH, Lee BR, Choi HS, Choi SH, Kim SY, An JJ, Kwon OS, Kang TC, Won MH, Cho SW, Lee KS, et al. Cysteine-321 of human brain GABA transaminase is involved in intersubunit cross-linking. *Mol Cells.* 2004; 18:214–9.
10. Reis H, Padden J, Ahrens M, Pütter C, Bertram S, Pott LL, Reis AC, Weber F, Juntermanns B, Hoffmann AC, Eisenacher M, Schlaak JF, Canbay A, et al. Differential

- proteomic and tissue expression analyses identify valuable diagnostic biomarkers of hepatocellular differentiation and hepatoid adenocarcinomas. *Pathology*. 2015; 47:543–50.
11. Montioli R, Fargue S, Lewin J, Zamparelli C, Danpure CJ, Borri Voltattorni C, Cellini B. The N-terminal extension is essential for the formation of the active dimeric structure of liver peroxisomal alanine:glyoxylate aminotransferase. *Int J Biochem Cell Biol*. 2012; 44:536–46.
  12. Kjersem JB, Thomsen M, Guren T, Hamfjord J, Carlsson G, Gustavsson B, Ikdahl T, Indrebø G, Pfeiffer P, Lingjærde O, Tveit KM, Wettergren Y, Kure EH. AGXT and ERCC2 polymorphisms are associated with clinical outcome in metastatic colorectal cancer patients treated with 5-FU/oxaliplatin. *Pharmacogenomics J*. 2016; 16:272–9.
  13. Marcadier JL, Smith AM, Pohl D, Schwartztruber J, Al-Dirbashi OY; FORGE Canada Consortium, Majewski J, Ferdinandusse S, Wanders RJ, Bulman DE, Boycott KM, Chakraborty P, Geraghty MT. Mutations in ALDH6A1 encoding methylmalonate semialdehyde dehydrogenase are associated with dysmyelination and transient methylmalonic aciduria. *Orphanet J Rare Dis*. 2013; 8:98.
  14. Liu Y, Zhu X, Zhu J, Liao S, Tang Q, Liu K, Guan X, Zhang J, Feng Z. Identification of differential expression of genes in hepatocellular carcinoma by suppression subtractive hybridization combined cDNA microarray. *Oncol Rep*. 2007; 18:943–51.
  15. Xu W, Zhou W, Cheng M, Wang J, Liu Z, He S, Luo X, Huang W, Chen T, Yan W, Xiao J. Hypoxia activates Wnt/ $\beta$ -catenin signaling by regulating the expression of BCL9 in human hepatocellular carcinoma. *Sci Rep*. 2017; 7:40446.
  16. Thomas M, Bayha C, Vetter S, Hofmann U, Schwarz M, Zanger UM, Braeuning A. Activating and Inhibitory Functions of WNT/ $\beta$ -Catenin in the Induction of Cytochromes P450 by Nuclear Receptors in HepaRG Cells. *Mol Pharmacol*. 2015; 87:1013–20.
  17. Caldinelli L, Molla G, Sacchi S, Pilone MS, Pollegioni L. Relevance of weak flavin binding in human D-amino acid oxidase. *Protein Sci*. 2009; 18:801–10.
  18. Fang J, Sawa T, Akaike T, Maeda H. Tumor-targeted delivery of polyethylene glycol-conjugated D-amino acid oxidase for antitumor therapy via enzymatic generation of hydrogen peroxide. *Cancer Res*. 2002; 62:3138–43.
  19. Hoeffler G, Forstner M, McGuinness MC, Hulla W, Hiden M, Krisper P, Kenner L, Ried T, Lengauer C, Zechner R, Moser HW, Chen GL. cDNA cloning of the human peroxisomal enoyl-CoA hydratase: 3-hydroxyacyl-CoA dehydrogenase bifunctional enzyme and localization to chromosome 3q26.3–3q28: a free left Alu Arm is inserted in the 3' noncoding region. *Genomics*. 1994; 19:60–7.
  20. Suto K, Kajihara-Kano H, Yokoyama Y, Hayakari M, Kimura J, Kumano T, Takahata T, Kudo H, Tsuchida S. Decreased expression of the peroxisomal bifunctional enzyme and carbonyl reductase in human hepatocellular carcinomas. *J Cancer Res Clin Oncol*. 1999; 125:83–8.
  21. Horvath S, Dong J. Geometric interpretation of gene coexpression network analysis. *PLoS Comput Biol*. 2008; 4:e1000117.
  22. Yip AM, Horvath S. Gene network interconnectedness and the generalized topological overlap measure. *BMC Bioinformatics*. 2007; 8:22.
  23. Ravasz E, Somera AL, Mongru DA, Oltvai ZN, Barabási AL. Hierarchical organization of modularity in metabolic networks. *Science*. 2002; 297:1551–5.
  24. Albert R. Scale-free networks in cell biology. *J Cell Sci*. 2005; 118:4947–57.
  25. Presson AP, Sobel EM, Papp JC, Suarez CJ, Whistler T, Rajeevan MS, Vernon SD, Horvath S. Integrated weighted gene co-expression network analysis with an application to chronic fatigue syndrome. *BMC Syst Biol*. 2008; 2:95.
  26. Shi J, Walker MG. Gene set enrichment analysis (GSEA) for interpreting gene expression profiles. *Current Bioinformatics*. 2007; 2:133–7.
